# Supplementary material
Source: Springer Nature journal article supplement (https://www.springermedizin.de/resource/supplementary/12990_2010_365_MOESM4_ESM.pdf/9613276)

# (A) L-NAME

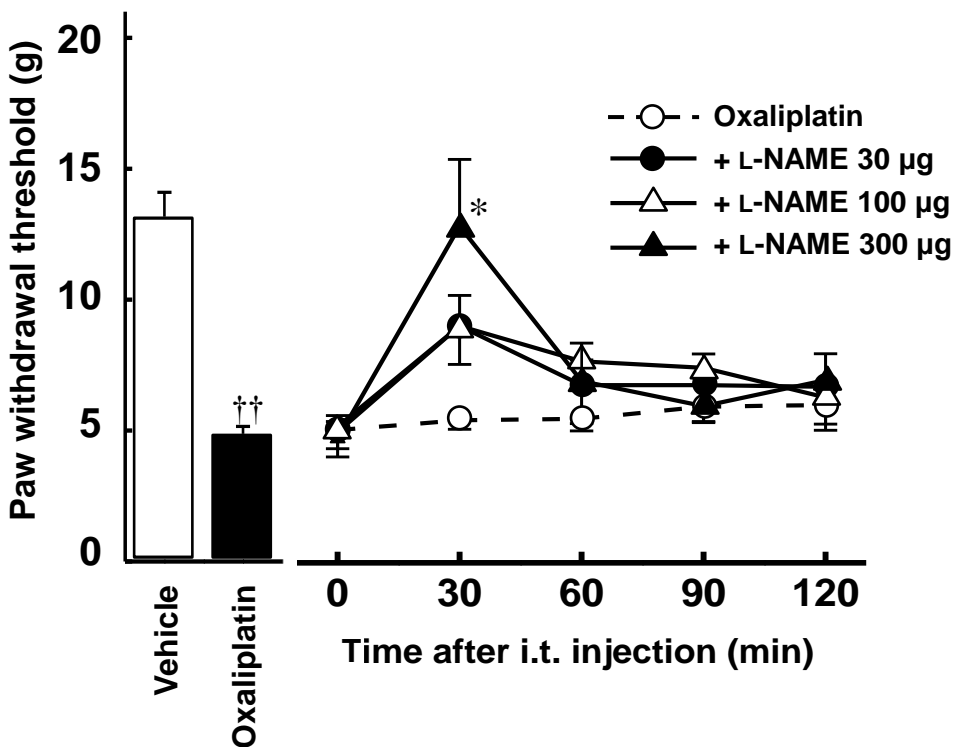

# (B) 7-Nitroindazole

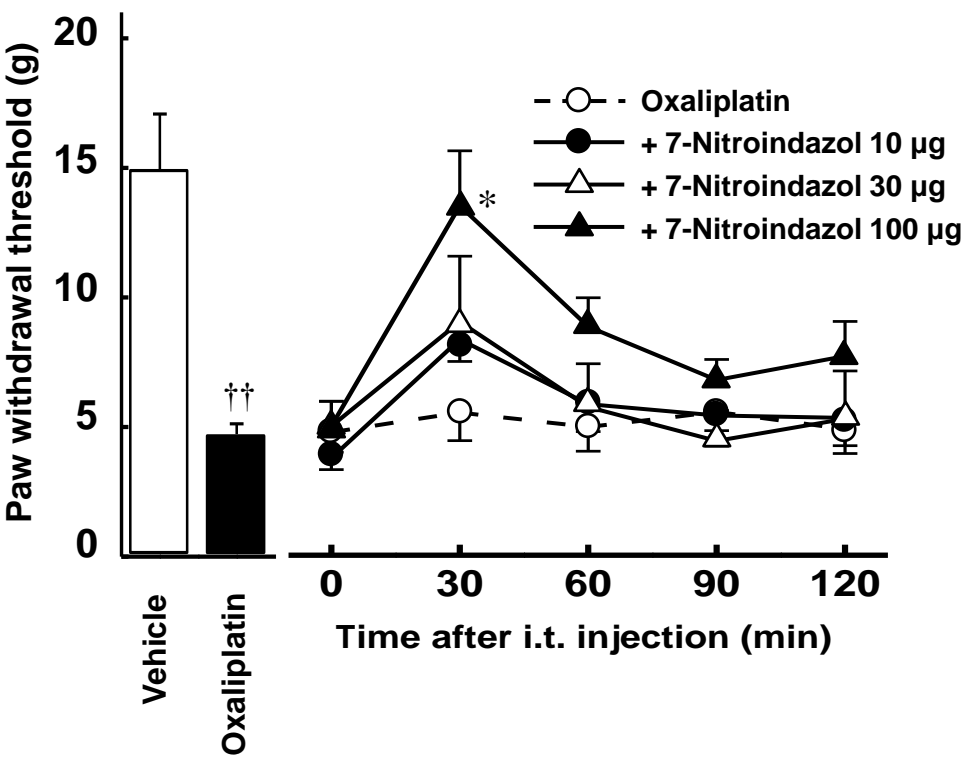

Supplement: MOESM4 [file 9613276]
